# Supplementary material for: Quercetin Potentiates the NGF-Induced Effects in Cultured PC 12 Cells: Identification by HerboChips Showing a Binding with NGF
Source: Evid Based Complement Alternat Med. 2018 Feb 28;2018:1502457. doi: 10.1155/2018/1502457 (PMC5850895; doi:10.1155/2018/1502457)
Supplement: Supplementary Materials — 308 work flow of HerboChips screening and validation examination on biotinylated NGF probe are available as Supporting Information. Figure 1S: standard work flow of HerboChips screening. Figure 2S: validation on the efficiencies of biotinylation on nerve grow factor (NGF). Brain lysate and biotinylated NGF were loaded into gel and underwent SDS-PAGE. Images were captured after probing with Cy3 or Cy5 linked streptavidin by a fluorescence imager. [file 1502457.f1.docx]

**Supporting information**

**Quercetin Potentiates the NGF-induced Effects in Cultured PC 12 Cells: Identification by HerboChips® Showing a Binding with NGF**

Gallant KL Chan1,2, Winnie W Hu2 , Zoey X Zheng1, Yan Lin1,2, Caroline Wang2, M Huang3, XY Yang3, Karl WK Tsim1,2, Tina TX Dong1,2

1Shenzhen Research Institute, The Hong Kong University of Science and Technology, Shenzhen, 518057, China

2Division of Life Science and Center for Chinese Medicine, The Hong Kong University of Science and Technology, Hong Kong

3YNBY Lab INC., No. 51, Xi-Ba Rd., Kunming, Yunnan Province, PR China 650032.

**Correspondence**

Dr. Tina Dong, Shenzhen Research Institute, The Hong Kong University of Science and Technology, Shenzhen, 518057, China. Email: [botina@ust.hk](mailto:botina@ust.hk) Phone: +852 2358 7318 Fax +852 2358 7323

**
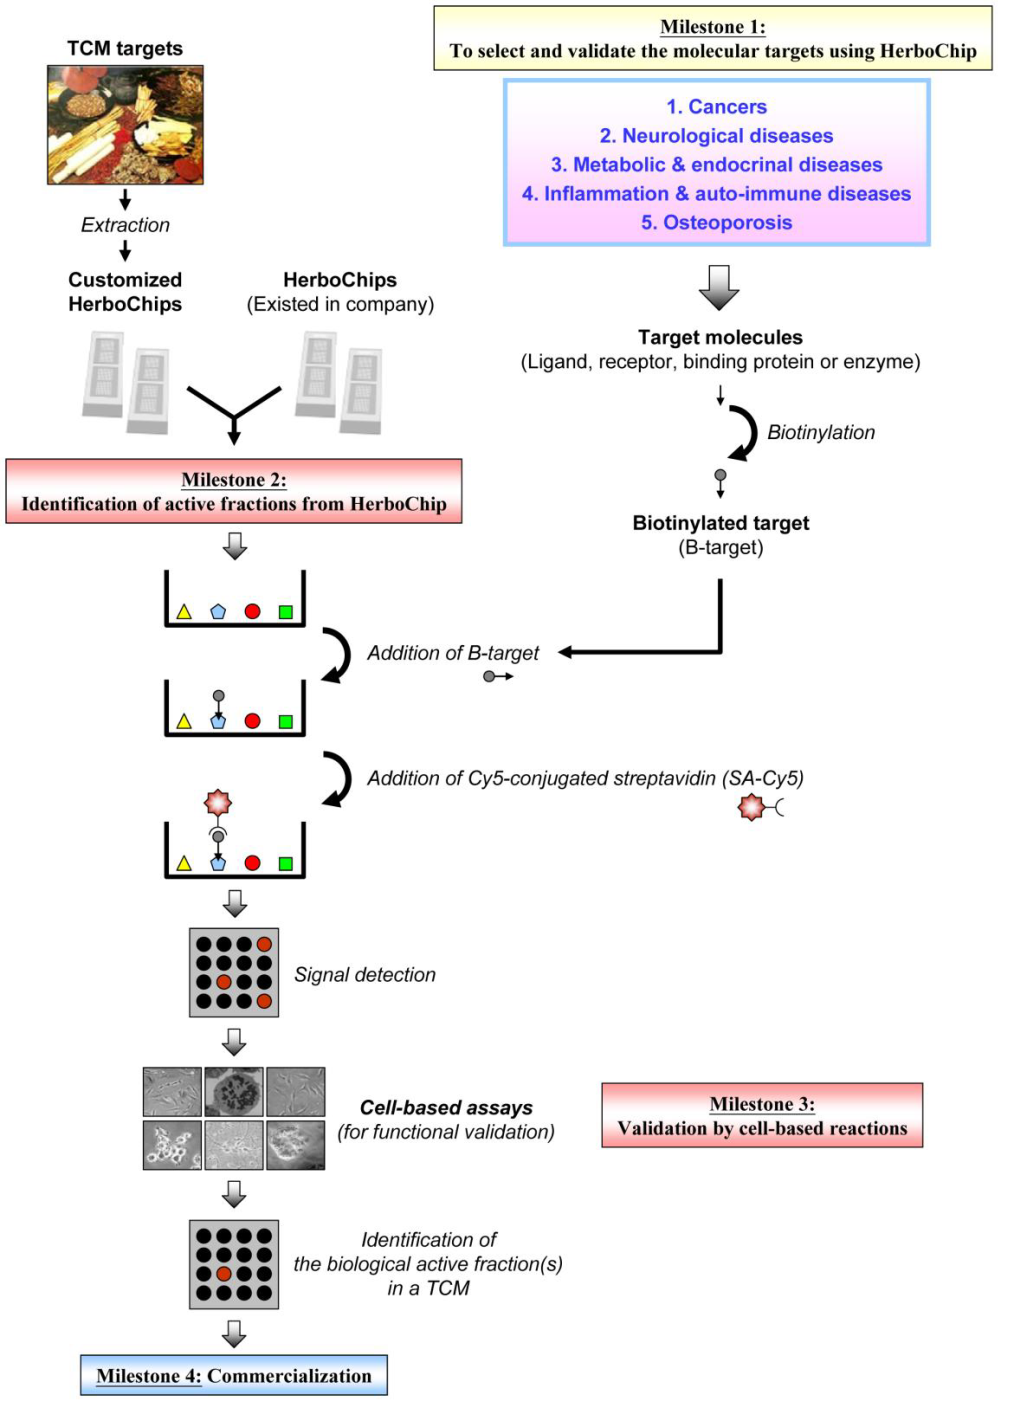
**

**Fig. 1S** Standard work flow of HerboChips screening


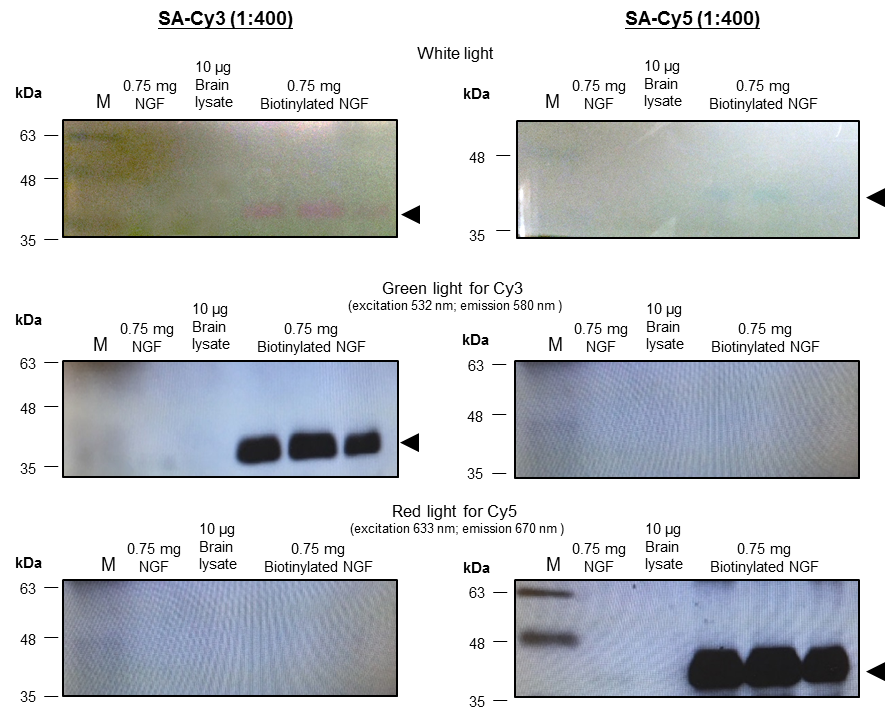


**Fig. 2S** Validation on the efficiencies of biotinylation on nerve grow factor NGF). Brain lysate and biotinylated NGF were loaded into gel and underwent SDS-PAGE, Image were captured after probing with Cy3 or Cy5 linked streptavidin by a fluorescence imager.
